# Supplementary material for: Rapid identification of health care–associated infections with an integrated fluorescence anisotropy system
Source: PubMed Central journal article supplement — Sci Adv. 2016 May 6;2(5):e1600300. doi: 10.1126/sciadv.1600300 (PMC5565941; doi:10.1126/sciadv.1600300), 2016-05-06
Supplement: 1600300_SM.pdf [file 1600300_SM.pdf]

## Supplementary Materials for

### **Rapid identification of health care–associated infections with an integrated fluorescence anisotropy system**

Ki Soo Park, Chen-Han Huang, Kyunghoon Lee, Yeong-Eun Yoo, Cesar M. Castro, Ralph Weissleder, Hakho Lee

Published 6 May 2016, *Sci. Adv.* **2**, e1600300 (2016)  
DOI: 10.1126/sciadv.1600300

#### **The PDF file includes:**

- table S1. Target sequences recognized by established detection keys.
- table S2. Summary of a set of ARV factors targeted in this study.
- table S3. DNA sequences used in this study.
- fig. S1. Schematic of the plastic cartridge for RNA extraction.
- fig. S2. Comparison between the fluidic cartridge and a commercial column.
- fig. S3. The optical detection system in the PAD.
- fig. S4. Snapshots of a PAD application.
- fig. S5. The circuit diagram of the detection system.
- fig. S6. The effect of dUTP on the PAD assay.
- fig. S7. Portable PAD system.
- fig. S8. Lyophilized probes.
- fig. S9. Electrophoretic band-shift assay.
- fig. S10. Detection of ARV factors.
- fig. S11. Overall assay procedure for clinical samples.
- fig. S12. Universal and species-specific detection of HAI pathogens in clinical samples by the PAD system.
- fig. S13. Detection of ARV factors in clinical samples with PAD (top) and qPCR (bottom).
- References (29, 30)

**table S1.** Target sequences recognized by established detection keys.

| Category      | Target                  | DNA sequence (5' - 3')                                                        |
|---------------|-------------------------|-------------------------------------------------------------------------------|
| Gram-positive | <i>Streptococcus</i>    | GAAGAACGAGTGTGAGAGTGGAAAGTTCACACTGTGACGGTATCTTACCAGAAA<br>GGGACGGCTAACTA      |
|               | <i>Enterococcus</i>     | GAAGAACAAGGACGTTAGTAACTGAACGTCCCCTGACGGTATCTAACCAGAAAAG<br>CCACGGCTAACTAC     |
|               | <i>Clostridium</i>      | GTCTTCAGGGACGATAATGACGGTACCTGAGGAGGAAGCCACGGCTAACTACG<br>TGCCAGCAGCCGCGGTAAT  |
|               | <i>Lactobacillus</i>    | GGAGGCAGCAGTAGGGAATCTCCACAATGGACGCAAGTCTGATGGAGCAA                            |
|               | <i>Corynebacterium</i>  | CCTTTCGCAACCGACGAAGCTTTTGTGACGGTAGGTTGAGAAGAAGCACCGGC<br>TAACT                |
|               | <i>Bacillus</i>         | GTTGTTAGGGAGAACAAGTGC GTTCAAATAGGGCGGCACCTTGACGGTACCT<br>AACCAGAAAAGCCACGG    |
| Gram-negative | <i>Haemophilus</i>      | TCATGGCATGCGGCCTTGCGGTCCC GCACTTTCATCTTCCGATTCTACGCGGTA<br>TTAGCGAC           |
|               | <i>Proteus</i>          | GGAGGAAGGTGATAAGGTTAATACCTTNTCAATTGACGTTACCCGCAGAAGAA<br>GCACCGGCTAACTCC      |
|               | <i>Citrobacter</i>      | ACGGAGTTAGCCGGTGCTTCTTCTGCGAGTAACGTCAATTGCTGCGGTTATTAA<br>CCACAACACCTTCTCC    |
|               | <i>Serratia</i>         | TCAGCGGGGAGGAAGGTGGTGAACCTAATACGTTCAATTGACGTTACTCGC<br>AGAAGAAGCACCGGCTAA     |
|               | <i>Stenotrophomonas</i> | AATGCGTAGAGATCAGGAGGAACATCCATGGCGAAGGCAGCTACCTGGACCAA<br>CATTGA               |
|               | <i>Legionella</i>       | TTCAGTGGGGAGGAGGATTGATAGGTTAAGAGCTGATTGATTGGACGTTACCCA<br>CAGAAGAAGCACCGGCT   |
|               | <i>Neisseria</i>        | TTTGTCAGGGAAAGAAAAGGCTGTTGCTAATATCAGCGGCTGATGACGGTACCTG<br>AAGAATAAGCACCGGCTA |
|               | <i>Moraxella</i>        | TTAAGTGGGGAGGAAAAGCTTGTGGTTAATACCCACAAGCCCTGACGTTACCCA<br>CAGAATAAGCA         |
|               | <i>Bacteroides</i>      | TCATTAGACATAAAGTGCAGTCATGTCATGTCATACTGTTTTGTCATGTCATAATA<br>TGAATAAGGATCGGCT  |
|               | <i>Mycobacterium</i>    | TCTTTCACCATCGACGAAGGTCCGGGTTCTCTGGATTGACGGTAGGTGGAGAA<br>GAAGCACCGGCCAA       |

**table S1 (continued).** Target sequences recognized by established detection keys.

| Gene  | Protein name                             | DNA sequence (5' - 3')                                            |
|-------|------------------------------------------|-------------------------------------------------------------------|
| ramA  | Transcriptional activator                | TACCGACCAGCGGGTTTATGATATCTGCCTGAAATACGGCTTTGATTTCGCAGCAGAC        |
| KPC   | Carbapenem-hydrolyzing beta-lactamase    | CGGCATAGTCATTTGCCGTGCCATACCCTCCGCAGGTTCCGGTTTTGTCTCCGACTG         |
| NDM   | Beta-lactamase                           | CGCATTGGCATAAGTCGCAATCCCCGCCGCATGCAGCGCGTCCATACCGCCCATCTTGT       |
| OXA   | Beta-lactamase                           | ACCCAACCTGTAAACCAACCTACTTGAGGGGTACAGCCATCCCCAGCCGCTTTTTG          |
| IMP   | Beta-lactamase                           | TGAATATTTAGCTTGTACCTTACCGGATTTTTTCAAAGTTCATTTGTTAATTCAGAT         |
| VIM   | Beta-lactamase                           | TAGCCGAGGTAGAGGGGAACGAGATTCCCACGCACTCTCTAGAAGGACTCTCATCGAGCG<br>G |
| SPM   | Beta-lactamase                           | CGTTAAATGCACGGTTGGGGATGTGAGACTACAGTCTCATTTGCGCAACGGCCTTTTC        |
| CTX-M | Beta-lactamase                           | CGTTAAACACCGCCATTCCGGGCGATCCGCGTGATACCACTTCACCTCGGGC              |
| TEM   | Beta-lactamase                           | TTGCACAACATGGGGGATCATGTAACCTCGCCTTGATCGTTGGGAACCGGAGCTGAATGAA     |
| ampC  | Beta-lactamase                           | GCGTCAAATCGACACTACCCGACATGTTGAGTTTTATT CATGCCAACCTTAACCCACAGA     |
| vanA  | Vancomycin/teicoplanin A-type resistance | TCCAATTCGTCCGCGCTATTGACTTTTTTACACCGAAGGATGAGCCTGAAC               |

**table S2.** Summary of a set of ARV factors targeted in this study (19, 20, 29, 30).

| Gene        | Protein name                  | Function                                                                                             | Positive strain                                                     |
|-------------|-------------------------------|------------------------------------------------------------------------------------------------------|---------------------------------------------------------------------|
| <i>nuc</i>  | Thermonuclease                | <i>S. aureus</i> specific factor important for in vivo survival                                      | HA-MRSA (ATCC BAA-1720), CA-MRSA (ATCC BAA-1707), MSSA (ATCC 25923) |
| <i>femB</i> | Aminoacyltransferase          | <i>S. aureus</i> specific factor essential for methicillin resistance, affecting level of resistance | HA-MRSA (ATCC BAA-1720), CA-MRSA (ATCC BAA-1707), MSSA (ATCC 25923) |
| <i>mecA</i> | Penicillin binding protein 2A | Methicillin resistance determinant                                                                   | HA-MRSA (ATCC BAA-1720), CA-MRSA (ATCC BAA-707)                     |
| PVL         | Panton-Valentine Leukocidin   | A cytotoxin, one of the $\beta$ -pore-forming toxins, affecting virulence of <i>S. aureus</i>        | CA-MRSA (ATCC BAA-1707), MSSA (ATCC 25923)                          |

**table S3.** DNA sequences used in this study.

| Target                   | Strand name           | DNA sequence (5' - 3')                           |                                                                              |
|--------------------------|-----------------------|--------------------------------------------------|------------------------------------------------------------------------------|
| Universal                | Amplicon              | GGTAAGGTTCTTCGCGTTGCN*TCGAATTAACCACATGCTCCA      |                                                                              |
|                          | Limiting primer       | GGAGCATGTGGTTTAATTCGA                            |                                                                              |
|                          | Excess primer         | GGTAAGGTTCTTCGCGTT                               |                                                                              |
| Reporter                 | Template              | CATGAATCTACTCGACGATATTGCTCAACTGTCATAAACTTCTGAGGA |                                                                              |
|                          | Primer                | TCCTCAGAAGTTT                                    |                                                                              |
|                          | FAM-DNA               | (FAM)-TATCGTCGAGTAGATTCATG                       |                                                                              |
| Species differentiation  | <i>Escherichia</i>    | Amplicon                                         | TGCGGGTAACGTCAATGAGCAAAGGTATTAACCTTACTCCCTCCTCCA                             |
|                          |                       | Limiting primer                                  | GGAGGAAGGGAGTAAAGTTAATACCTTTG                                                |
|                          |                       | Excess primer                                    | TGCGGGTAACGTCAATGAG                                                          |
|                          | <i>Klebsiella</i>     | Amplicon                                         | ACGGCAGTTAGCCGGTGCTTCTTCTGCGGGTAACGTCCAATCGCCAAGGTTATT AACCTTATCGCCTTGCCTCCA |
|                          |                       | Limiting primer                                  | GGAGGCAAGGCGATAAGGT                                                          |
|                          |                       | Excess primer                                    | ACGGCAGTTAGCCGGTGCTTCT                                                       |
|                          | <i>Acinetobacter</i>  | Amplicon                                         | GAGTTAGCCGGTGCTTATTCTGCGAGTAACGTCCACTATCCCTAGGTATTA ACTA GAA                 |
|                          |                       | Limiting primer                                  | TCTAGTTAATACCTAGGGATAGTGGACGTT                                               |
|                          |                       | Excess primer                                    | GAGTTAGCCGGTGCTTATTCTGCGAG                                                   |
|                          | <i>Pseudomonas</i>    | Amplicon                                         | TATTCTGTTGGTAACGTCAAAACAGCAAGGTATTAACCTACTGCCCTCCTCCA                        |
|                          |                       | Limiting primer                                  | GGAGGAAGGGCAGTAAGTTAATACCTTG                                                 |
|                          |                       | Excess primer                                    | GCTTATTCTGTTGGTAACGTCAAAACAG                                                 |
|                          | <i>Staphylococcus</i> | Amplicon                                         | GTAGTTAGCCGTGGCTTTCTGATTAGGTACCGTCAAGATGTGCACAGTTACTTA CACATATGTTCTTCCCA     |
|                          |                       | Limiting primer                                  | GGGAAGAACATATGTGTAAGTAAC                                                     |
|                          |                       | Excess primer                                    | GTAGTTAGCCGTGGCTTTCT                                                         |
| Resistance and virulence | <i>nuc</i>            | Amplicon                                         | CACCTGAAACAAAGCATCCTAAAAAAGGTGTAGAGAAATATGGTCCTGAAGCAA                       |
|                          |                       | Limiting primer                                  | TGCTTCAGGACCATATTTCTCTAC                                                     |
|                          |                       | Excess primer                                    | CACCTGAAACAAAGCATCCTAAA                                                      |
|                          | <i>femB</i>           | Amplicon                                         | TGAATTGAGCAAAACGGACGGCCCAATTCTAAACCTTGCTTCTGGA                               |
|                          |                       | Limiting primer                                  | CCAGAAGCAAGGTTTAGAATTG                                                       |
|                          |                       | Excess primer                                    | TGAATTGAGCAAAACGGACGGC                                                       |
|                          | <i>mecA</i>           | Amplicon                                         | ATGAAGGTGTGCTTACAAGTGCTAATAATTACCTGTTTGAGGGTGGATAGCAGA                       |
|                          |                       | Limiting primer                                  | CTGCTATCCACCCTCAAACAGG                                                       |
|                          |                       | Excess primer                                    | ATGAAGGTGTGCTTACAAGTGC                                                       |
|                          | PVL                   | Amplicon                                         | CACCTGATAAGCCGTTAGAGATATTAATATCTCCACCATAAGAATAACCTACCGA                      |
|                          |                       | Limiting primer                                  | CGGTAGGTTATTCTTATGGTGGAGAT                                                   |
|                          |                       | Excess primer                                    | CACCTGATAAGCCGTTAGAGATATT                                                    |

\* The nucleobase in bold letter (N) indicates Adenine (A) for *Escherichia*, *Klebsiella*, *Acinetobacter* or Thymine (T) for *Pseudomonas*, *Staphylococcus*.

## Supplementary Figures

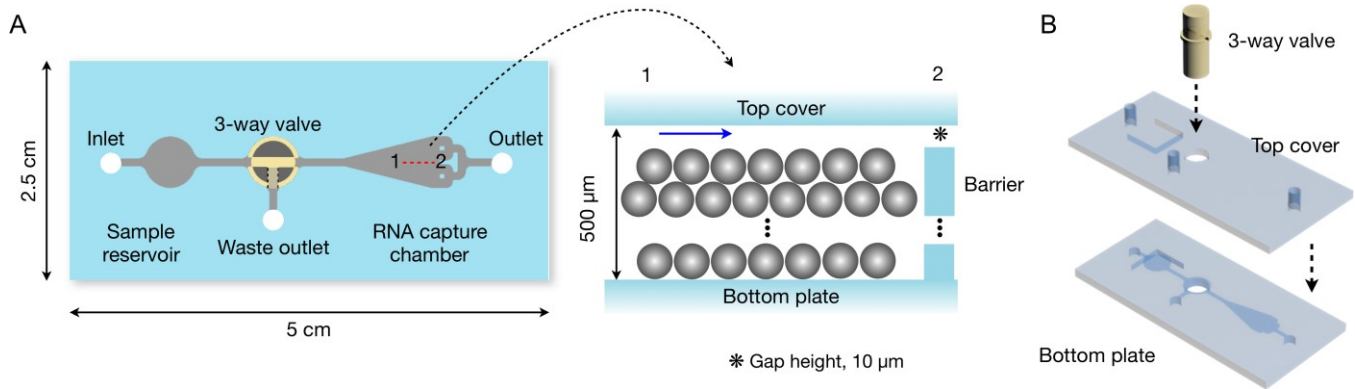

**fig. S1. Schematic of the plastic cartridge for RNA extraction. (A)** Top view. The device has a RNA capture chamber that is filled with glass beads. The 3-way valve (push-button style) is used to direct waste product to a separate outlet. The RNA chamber has weir style barrier (right) to retain glass beads while allowing for fluidic flow. Gap height (\*), 10 μm. **(B)** Device assembly. The bottom plate and the top cover were separately injection-molded, and glued together.

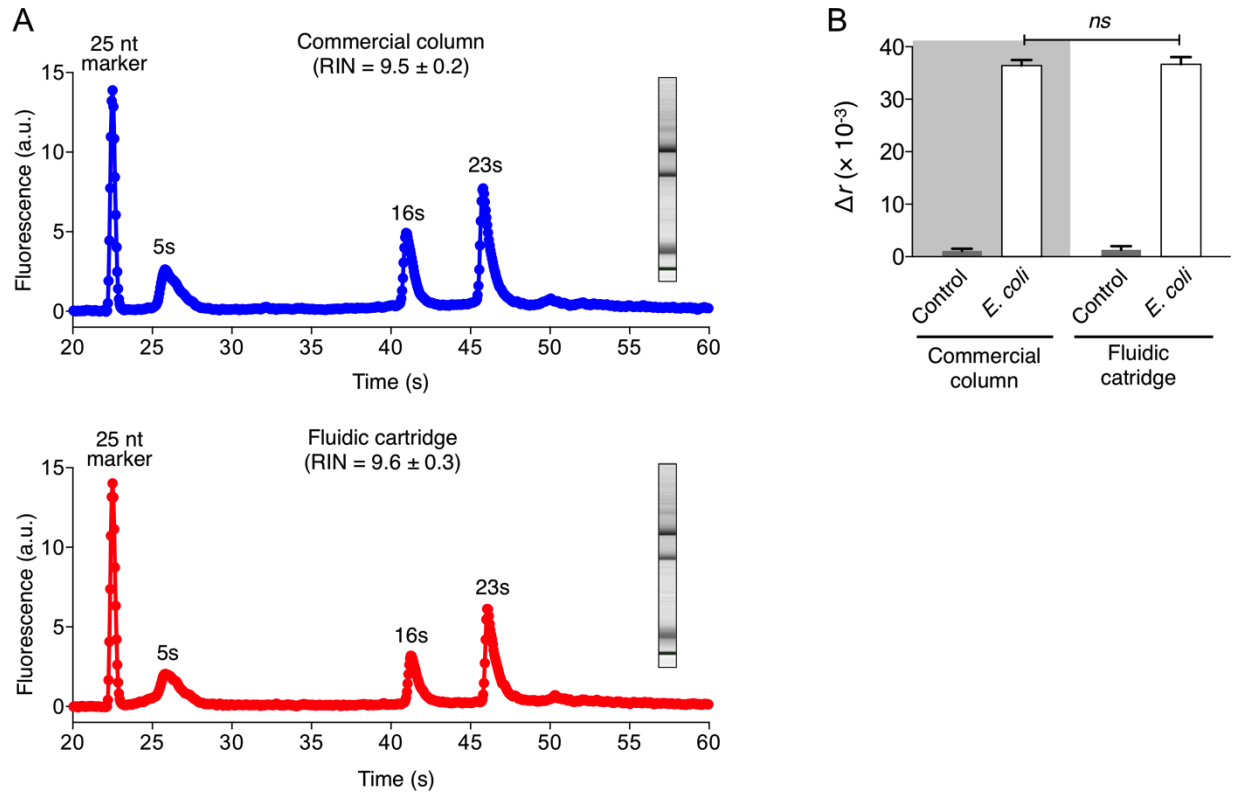

**fig. S2. Comparison between the fluidic cartridge and a commercial column.** Equal volumes of *E. coli* lysates were flown through a commercial column (Zymo Research) and the fluidic cartridge for total RNA extraction. **(A)** The RNA integrity was assessed by Bioanalyzer (Inset: ‘virtual gel’ pattern from the instrument). The RNA integrity number (RIN) indicated that high quality RNA was collected by the fluidic cartridge (RIN =  $9.6 \pm 0.3$ ). The number was comparable to that of a commercial column (RIN =  $9.5 \pm 0.2$ ). **(B)** The RNA extracted by a commercial column and the fluidic cartridge was amplified by asymmetric RT-PCR and detected by the PAD. The observed  $\Delta r$  values were statistically identical (two-tailed *t*-test,  $P > 0.64$ ).

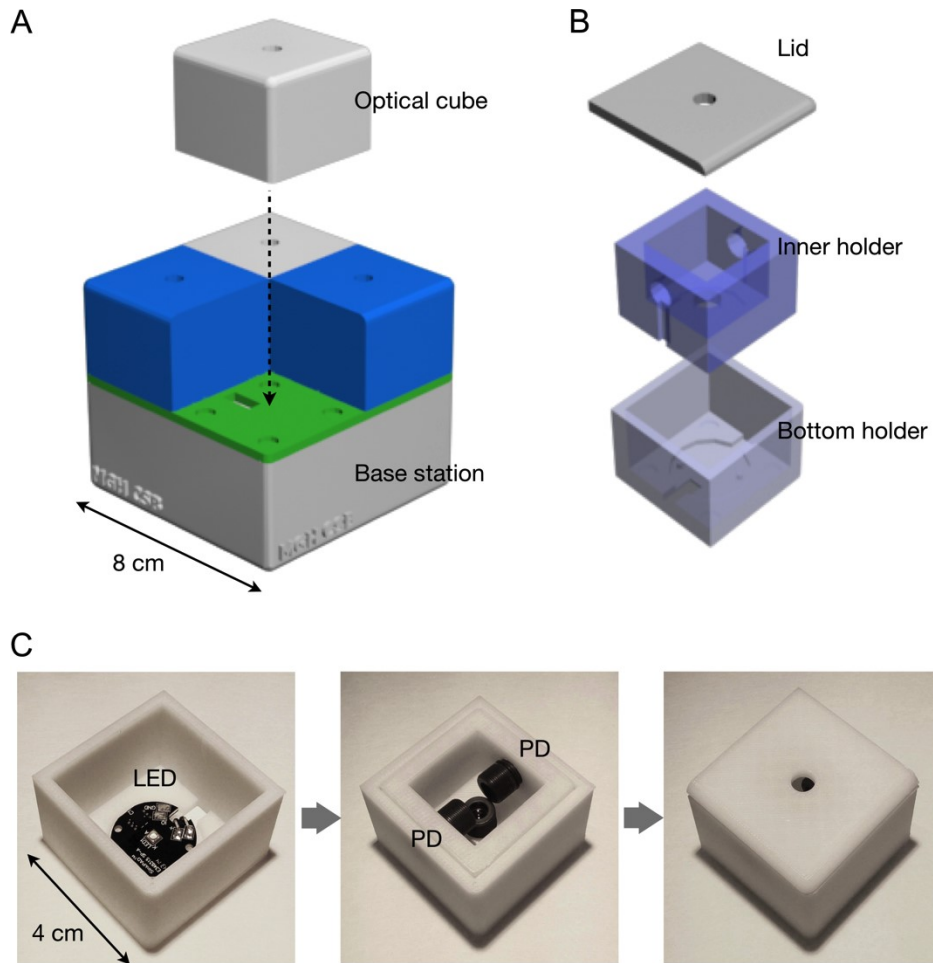

**fig. S3. The optical detection system in the PAD. (A)** The system has a modular structure. The base station contains control electronics, including a microcontroller and signal processing units. Four optical cubes are plugged into the base station. **(B)** Blow-up schematic of an optical cube. **(C)** Optical cube assembly. A LED circuit was positioned on the bottom holder. The inner holder, mounted with photodiodes (PDs), focusing lenses, and optical filters (polarizers), was inserted into the bottom holder and capped with a lid.



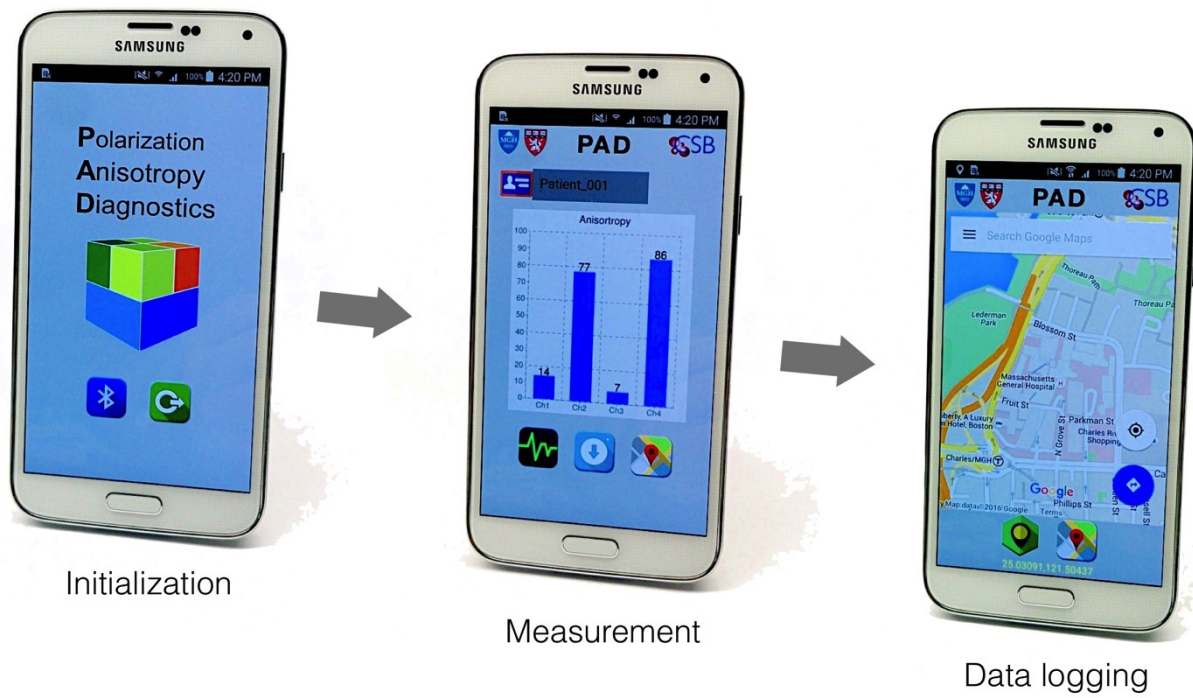

**fig. S4. Snapshots of a PAD application.** The PAD App has three main pages, namely, system initialization, measurement, and data storage with the geographic information.

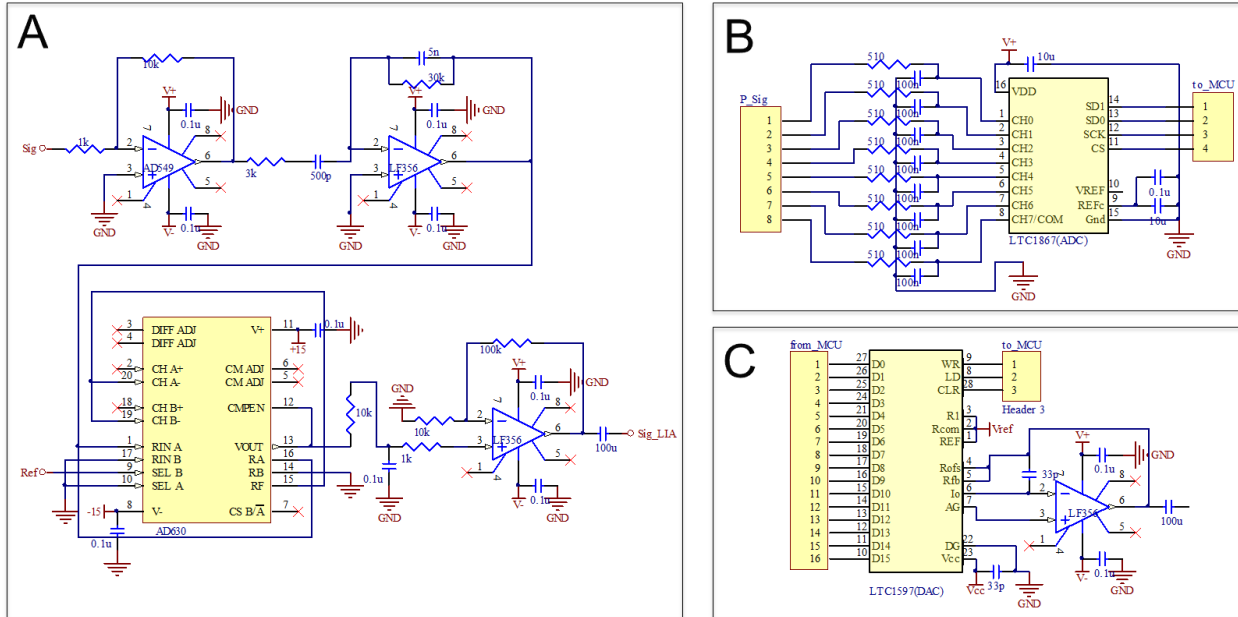

**fig. S5. Circuit diagrams of the detection system. (A)** Schematic of a custom-designed current amplifier circuit (AD549; Analog Devices), an active band pass filter, an analog lock-in circuit (AD630; Analog Devices), and a low pass filter. **(B)** A 16-bit analog-to-digital converter (LTC1867; Linear Technology) with a configurable 8-channel analog input multiplexer (MUX) was used. **(C)** A 16-bit digital-to-analog converter (LTC1597; Linear Technology) was used to deliver the modulated control signal to the LED driver.

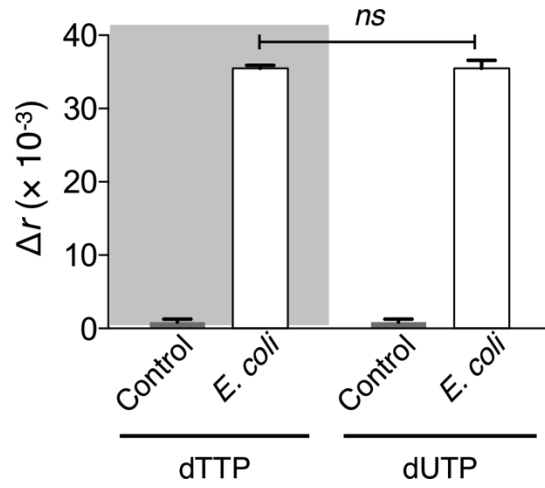

**fig. S6. The effect of dUTP on the PAD assay.** As compared to the original assay condition in which dTTP was used (left), no difference was observed when dTTP was replaced with dUTP (right). The observed  $\Delta r$  values in both cases were statistically identical (two-tailed *t*-test,  $P > 0.99$ ).

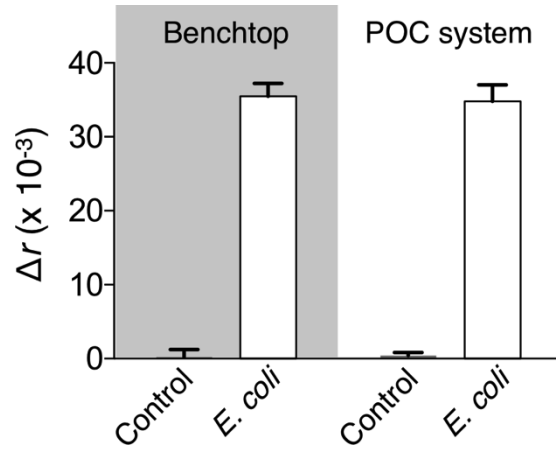

**fig. S7. Portable PAD system.** For on-site, point-of-care (POC) operation, the PAD detection was paired up with a miniaturized thermocycler (MiniPCR; Ampylus). The performance of a benchtop equipment and the POC-PAD was statistically identical (two-tailed *t*-test, *P* > 0.69).

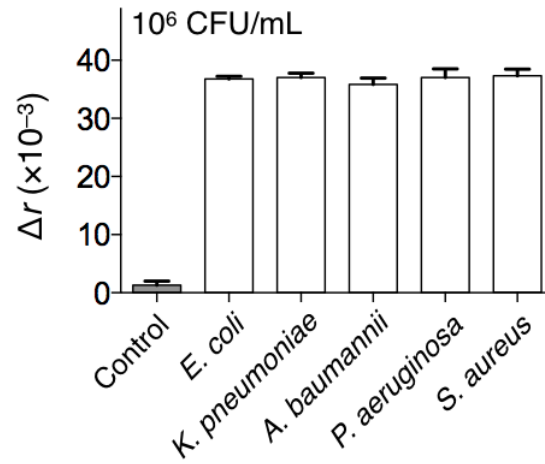

**fig. S8. Lyophilized probes.** The PAD reagents were lyophilized, stored for 2 weeks in ambient condition, and then used for bacterial detection. Five different HAI pathogens (10<sup>6</sup> CFU/mL) were detected with lyophilized reagents. The signal levels were comparable to those obtained by fresh reagents (**Fig. 3B**). All experiments were performed in triplicate, and the data are displayed as mean ± s.d.

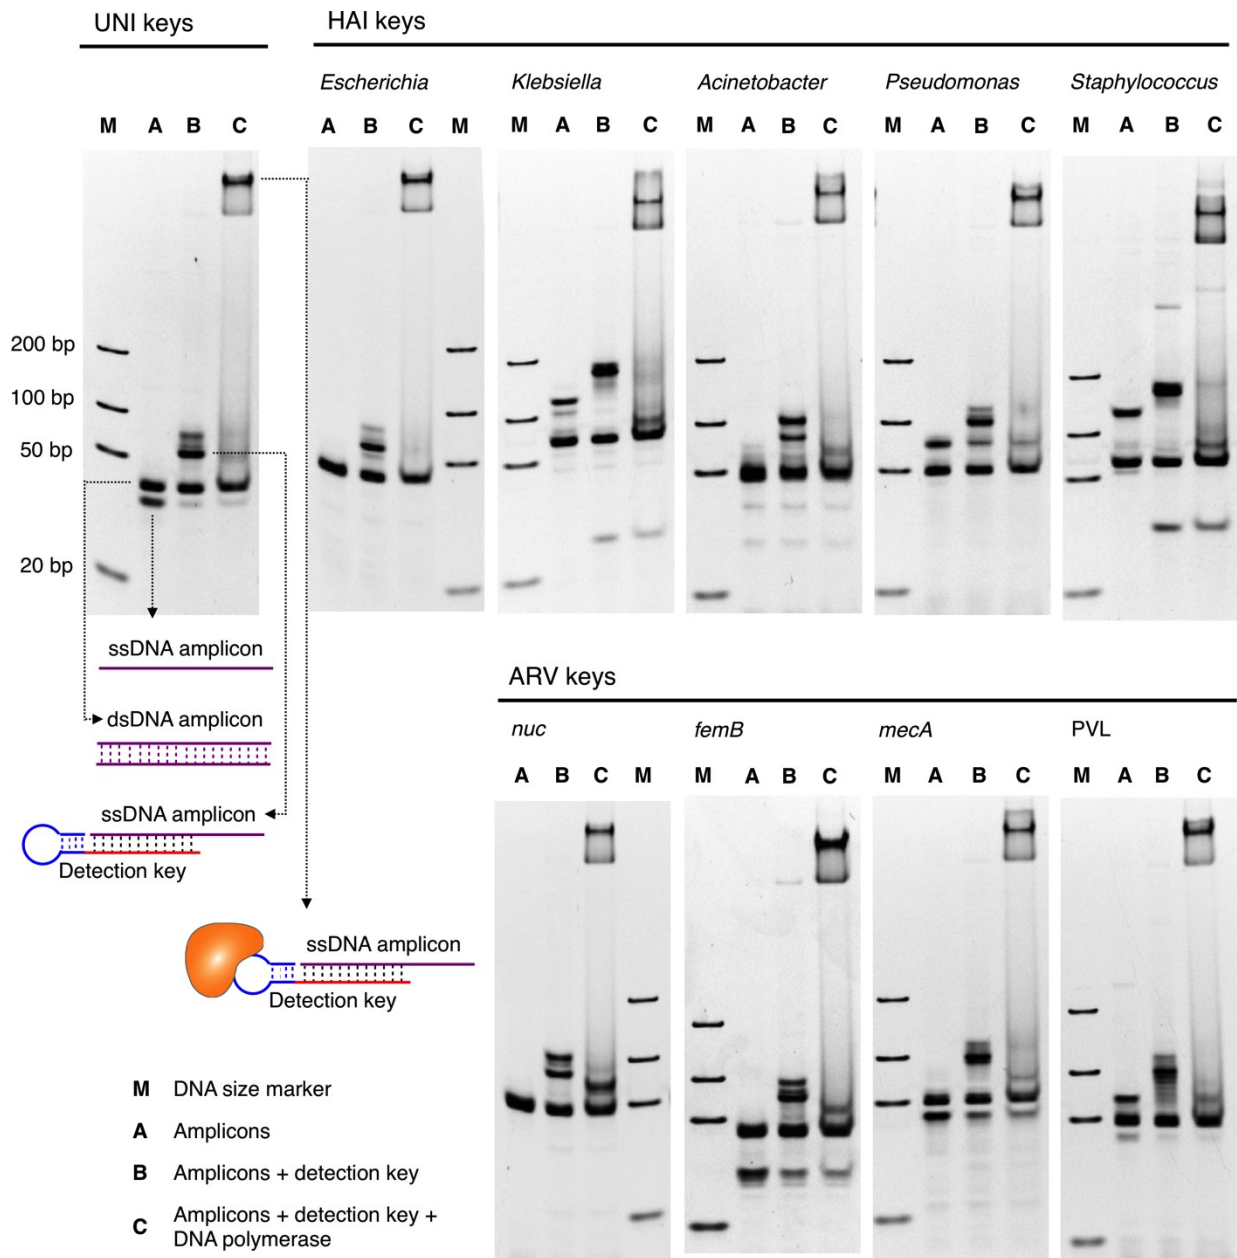

**fig. S9. Electrophoretic band-shift assay.** Lane A. Amplicons only. Lane B. Binding of amplicons with their detection keys produced new bands. Lane C. Adding DNA polymerase to B shifted the band for the amplicon and detection-key hybrid. This confirmed the binding between detection keys and DNA polymerase.

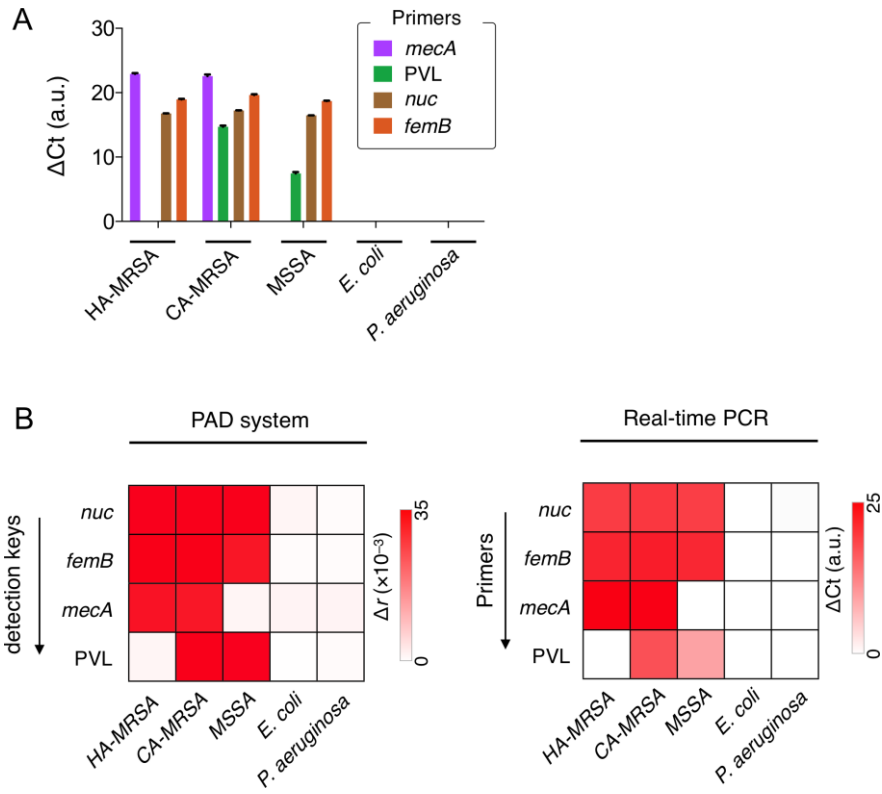

**fig. S10. Detection of ARV factors. (A)** Real-time PCR detection of *mecA*, PVL, *nuc*, and *femB* in bacterial species. SYBR Green assay was used. **(B)** Comparison between the PAD and the qPCR assays.

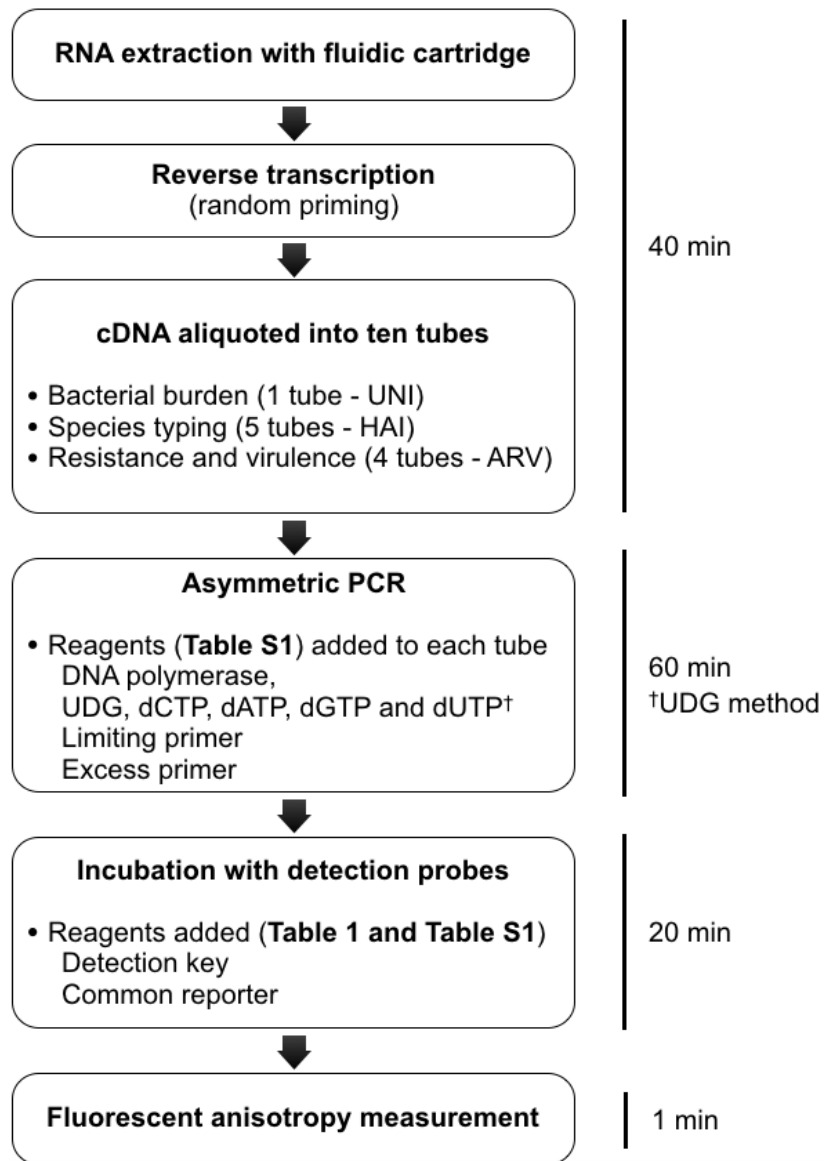

**fig. S11. Overall assay procedure for clinical samples.** Once the sample is aliquoted into individual tubes, the rest of the procedures are performed in the same tube.



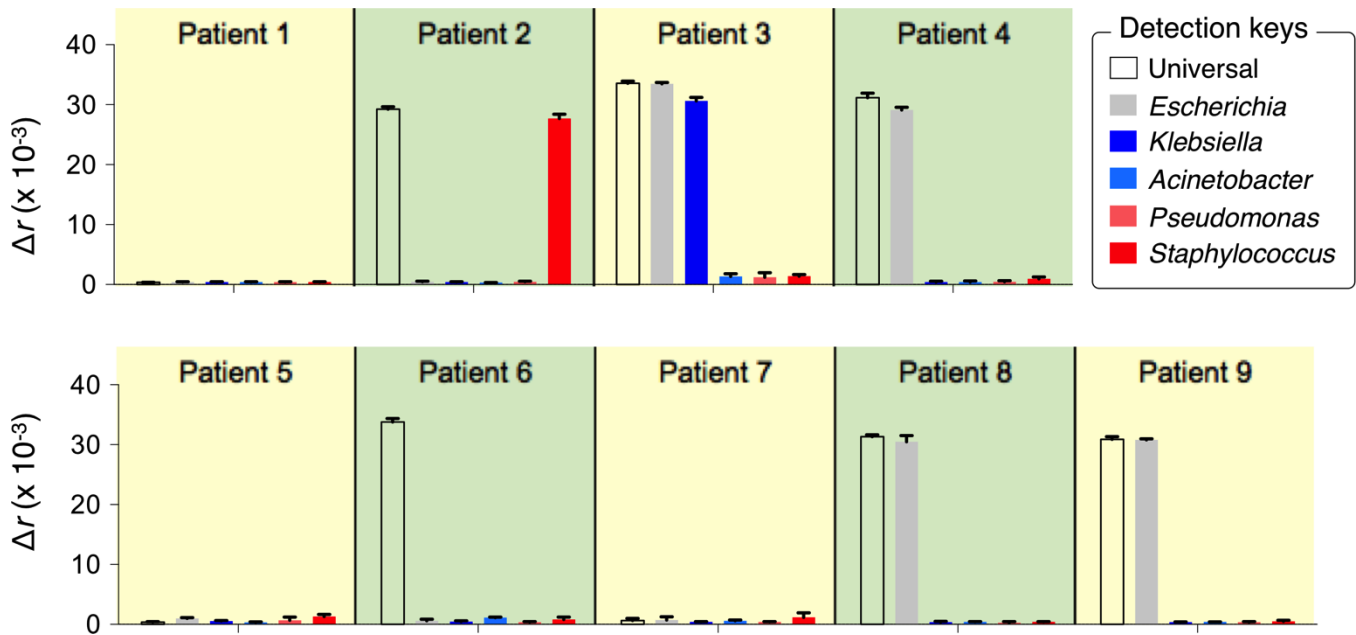

fig. S12. Universal and species-specific detection of HAI pathogens in clinical samples by the PAD system.

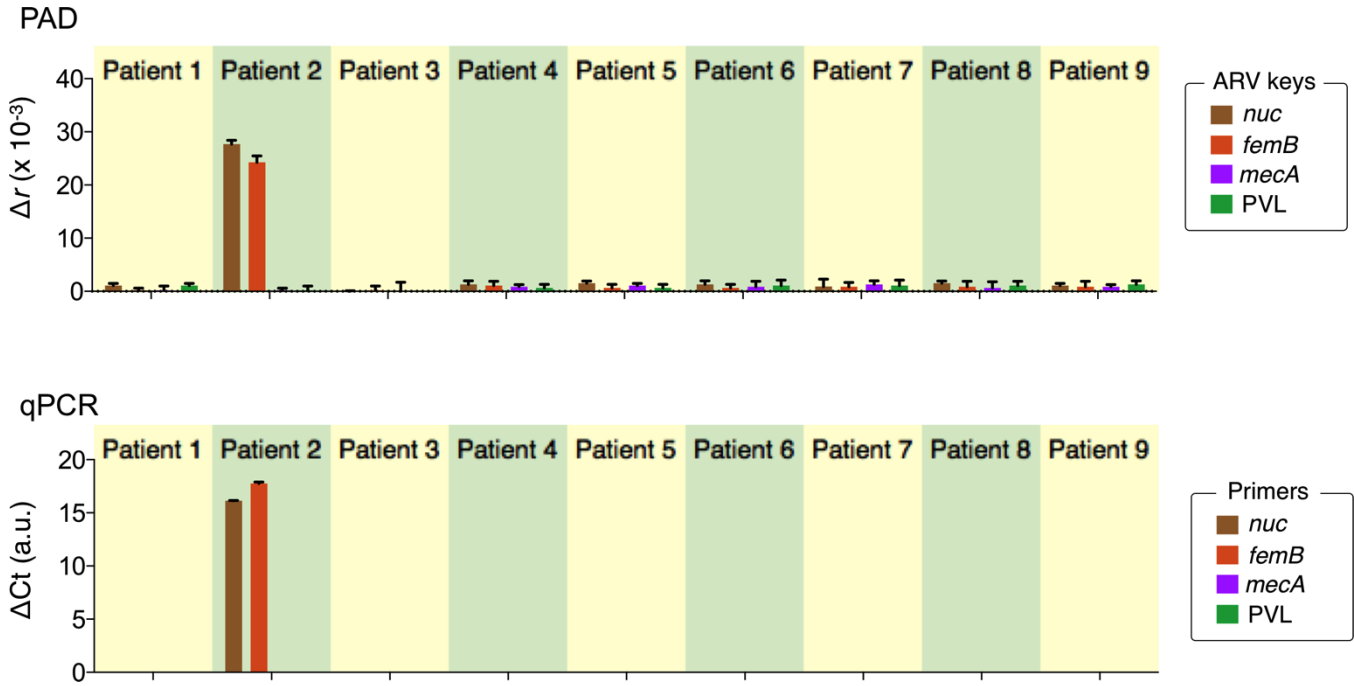

fig. S13. Detection of ARV factors in clinical samples with PAD (top) and qPCR (bottom).
